# Supplementary material for: Characterization and Comparative Genomic Analyses of Pseudomonas aeruginosa Phage PaoP5: New Members Assigned to PAK_P1-like Viruses
Source: PubMed Central journal article supplement (PMC5034324; doi:10.1038/srep34067), 2016-09-23
Supplement: srep34067-s1.pdf [file srep34067-s1.pdf]

# Characterization and Comparative Genomic Analyses of *Pseudomonas aeruginosa* Phage PaoP5: New Members Assigned to PAK\_P1-like Viruses

Mengyu Shen, Shuai Le, Xiaolin Jin, Gang Li, Yinling Tan, Ming Li, Xia Zhao, Wei Shen, Yuhui Yang, Jing Wang, Hongbin Zhu, Shu Li, Xiancai Rao, Fuquan Hu & Shuguang Lu

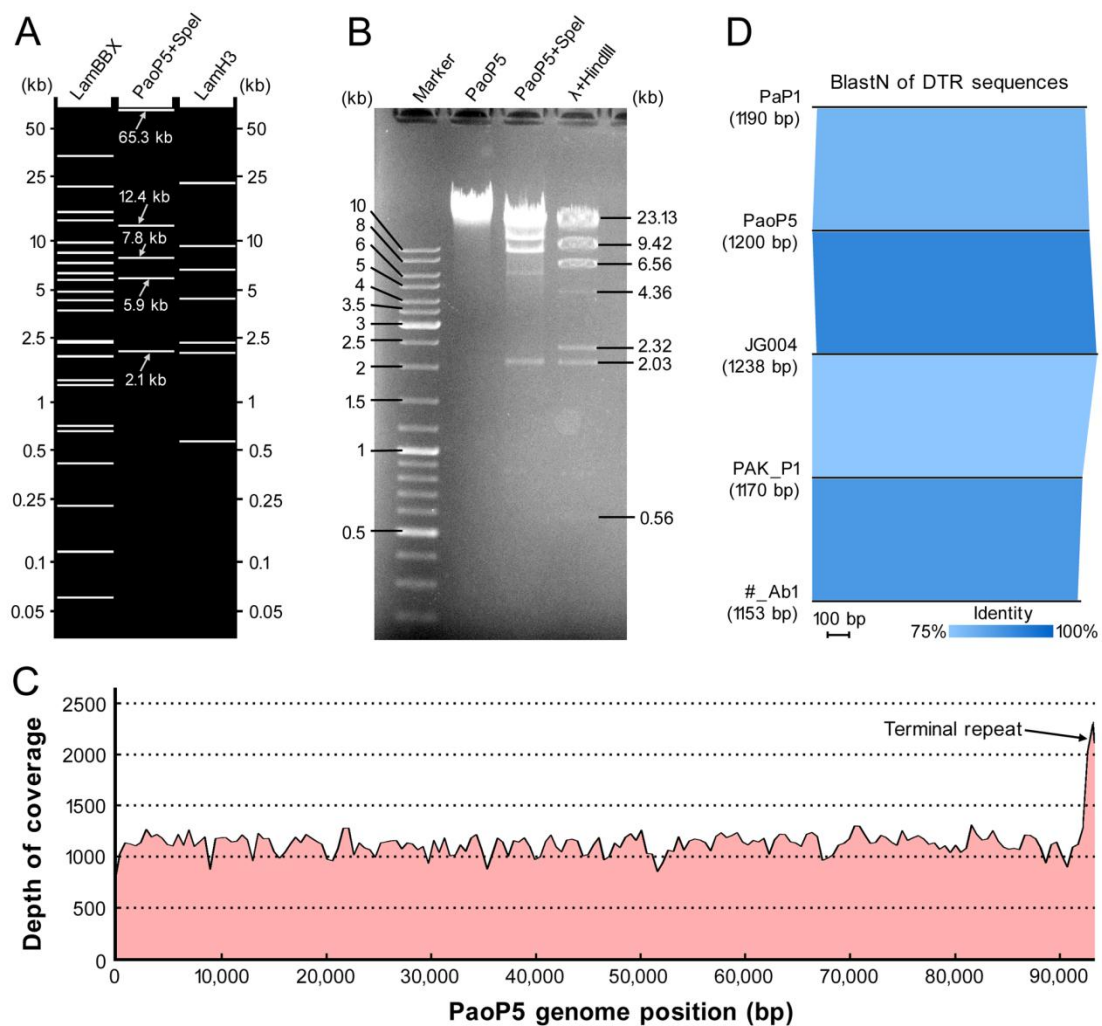

**Figure S1. Analysis of PaoP5 genome ends.** (A) Agarose gel simulation for digestion of PaoP5 genome DNA by restriction endonuclease SpeI. The length of each band is indicated by arrows. (B) Digestion of the PaoP5 genome DNA by SpeI. (C) Sequencing coverage of the PaoP5 genome, revealing a terminal repeat. (D) BlastN comparison of the DTR sequences of phages PaoP5, PaP1, JG004, PAK\_P1, and vB\_PaeM\_C2-10\_Ab1. # represents vB\_PaeM\_C2-10. The lengths of the corresponding DTR sequences are indicated in the parentheses.

# Characterization and Comparative Genomic Analyses of *Pseudomonas aeruginosa* Phage PaoP5: New Members Assigned to PAK\_P1-like Viruses

Mengyu Shen, Shuai Le, Xiaolin Jin, Gang Li, Yinling Tan, Ming Li, Xia Zhao, Wei Shen, Yuhui Yang, Jing Wang, Hongbin Zhu, Shu Li, Xiancai Rao, Fuquan Hu & Shuguang Lu

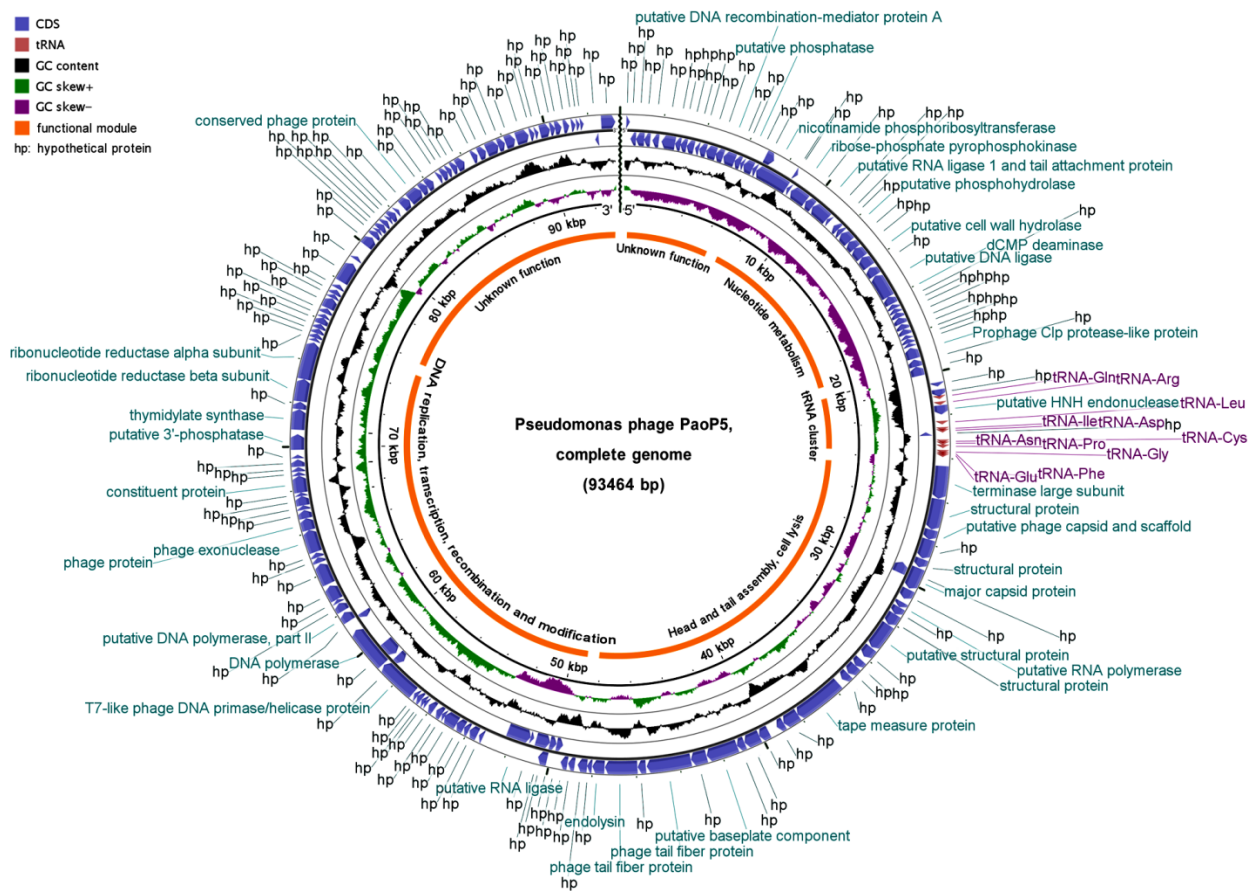

**Figure S2. Circular presentation of the PaoP5 genome.** The names of the predicted genes (also shown in the GenBank file of PaoP5 genome) are indicated in the outermost region. The outermost ring denotes genes on the plus strand, followed by rings that depict genes on the minus strand, GC content (black), GC skew (purple/green), position scales and functional modules, respectively.

# Characterization and Comparative Genomic Analyses of *Pseudomonas aeruginosa* Phage PaoP5: New Members Assigned to PAK\_P1-like Viruses

Mengyu Shen, Shuai Le, Xiaolin Jin, Gang Li, Yinling Tan, Ming Li, Xia Zhao, Wei Shen, Yuhui Yang, Jing Wang, Hongbin Zhu, Shu Li, Xiancai Rao, Fuquan Hu & Shuguang Lu

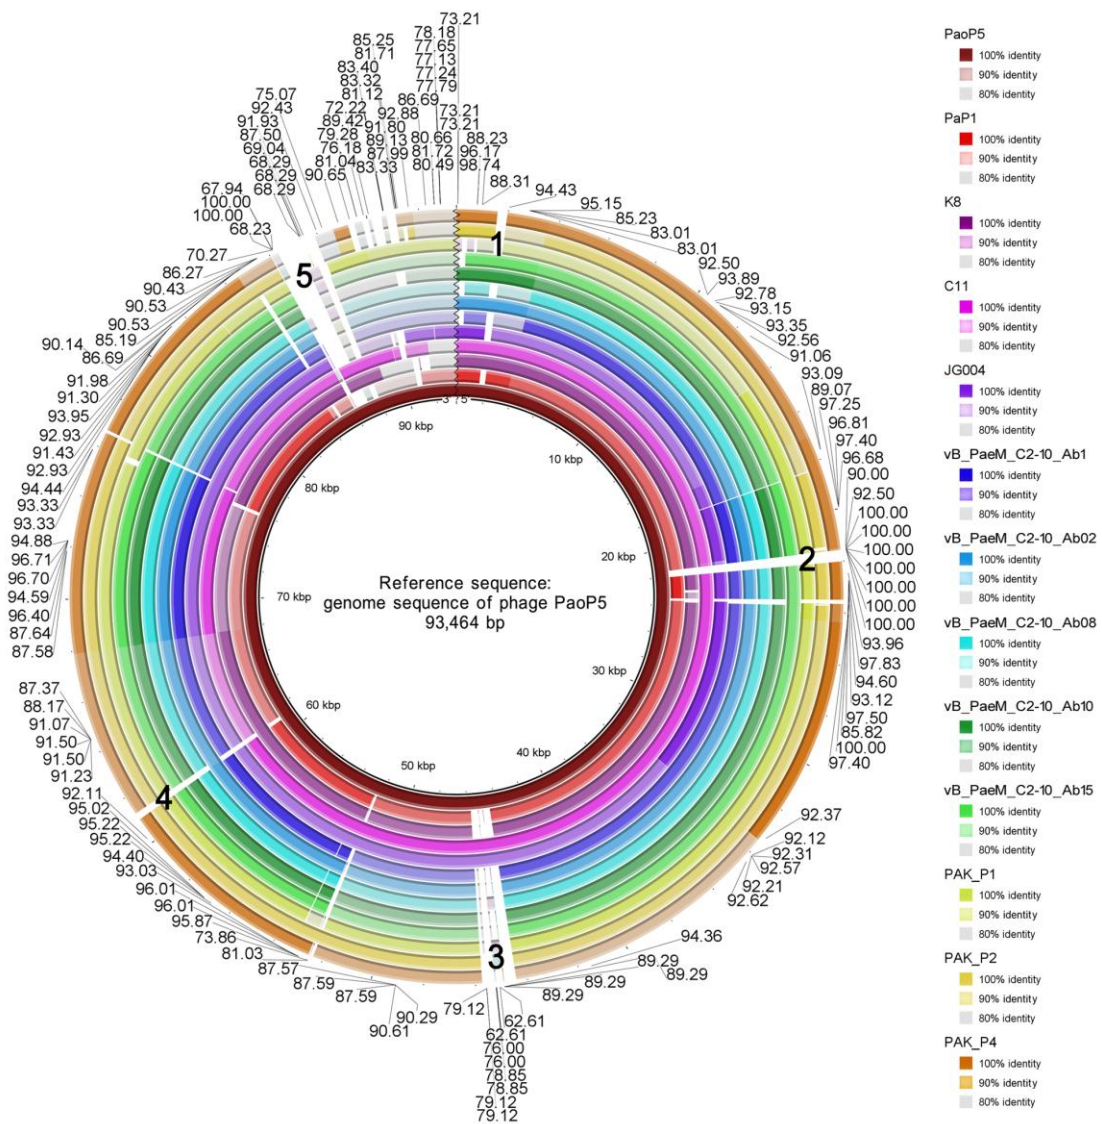

**Figure S3.** BRIG comparison of complete genome sequences of PaoP5 with other 12 phages listed in Table S2. The BlastN method was employed to perform the comparison. Identity labels of the 13 phage genomes are shown in the same order as

the rings from the innermost to the outermost. Identities of the corresponding comparison fragments are shown in the outermost region of the figure. Large low-identity genomic regions (over 270 bp in length) are indicated by the numbers from 1 to 5. The lengths of these five regions are 386, 470, 1,322, 272, and 1,900 bp, respectively. Region 1 is contained in a hypothetical protein and region 5 contains 4 hypothetical proteins. Regions 2, 3, and 4 are contained in a putative HNH endonuclease, a tail fiber protein and a DNA polymerase, respectively. These five regions are probably highly variable in the process of phage evolution, and some of these regions could be exchanged by horizontal gene transfer (HGT).

# Characterization and Comparative Genomic Analyses of *Pseudomonas aeruginosa* Phage PaoP5: New Members Assigned to PAK\_P1-like Viruses

Mengyu Shen, Shuai Le, Xiaolin Jin, Gang Li, Yinling Tan, Ming Li, Xia Zhao, Wei Shen, Yuhui Yang, Jing Wang, Hongbin Zhu, Shu Li, Xiancai Rao, Fuquan Hu & Shuguang Lu

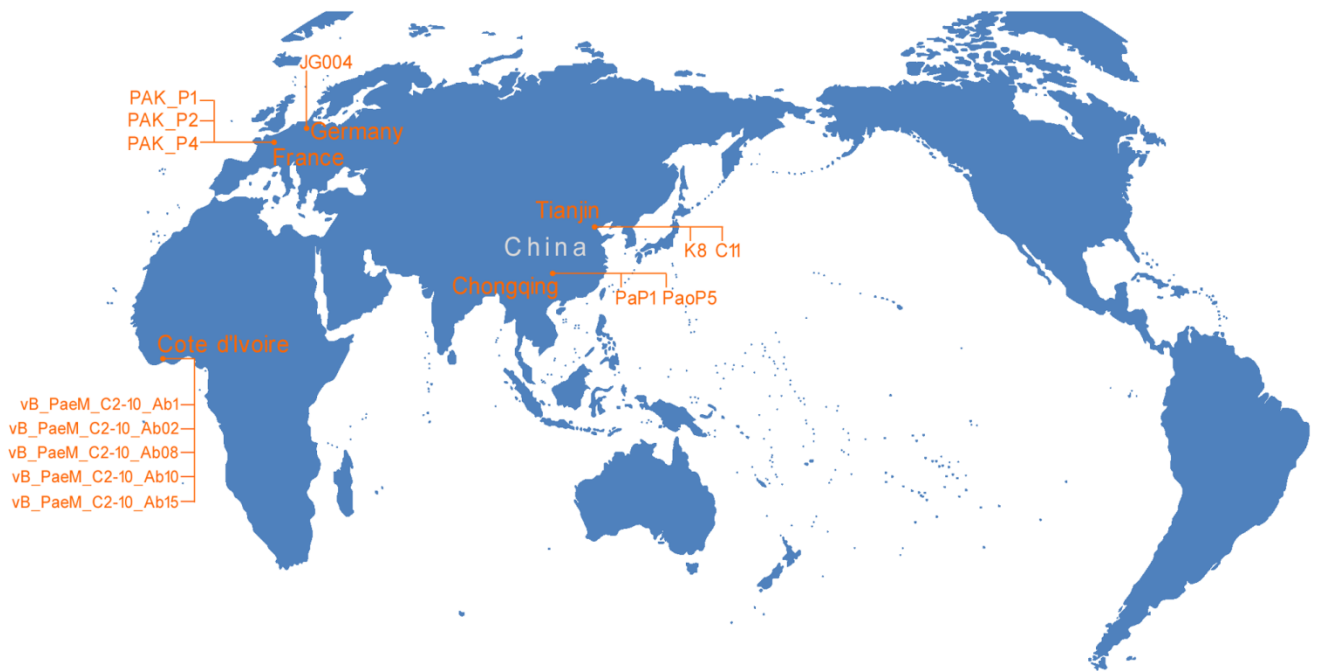

**Figure S4. Geographical distribution of PAK\_P1-like viruses.** The diagram of world map was generated by software OfficeAssist ver. 0239.80.12012 (<http://meihua.docer.com/>). The text labels were added using Microsoft PowerPoint ver. 14.0.4760.1000 (<https://www.microsoft.com/zh-cn>).



# Characterization and Comparative Genomic Analyses of *Pseudomonas aeruginosa* Phage PaoP5: New Members Assigned to PAK\_P1-like Viruses

Mengyu Shen, Shuai Le, Xiaolin Jin, Gang Li, Yinling Tan, Ming Li, Xia Zhao, Wei Shen, Yuhui Yang, Jing Wang, Hongbin Zhu, Shu Li, Xiancai Rao, Fuquan Hu & Shuguang Lu

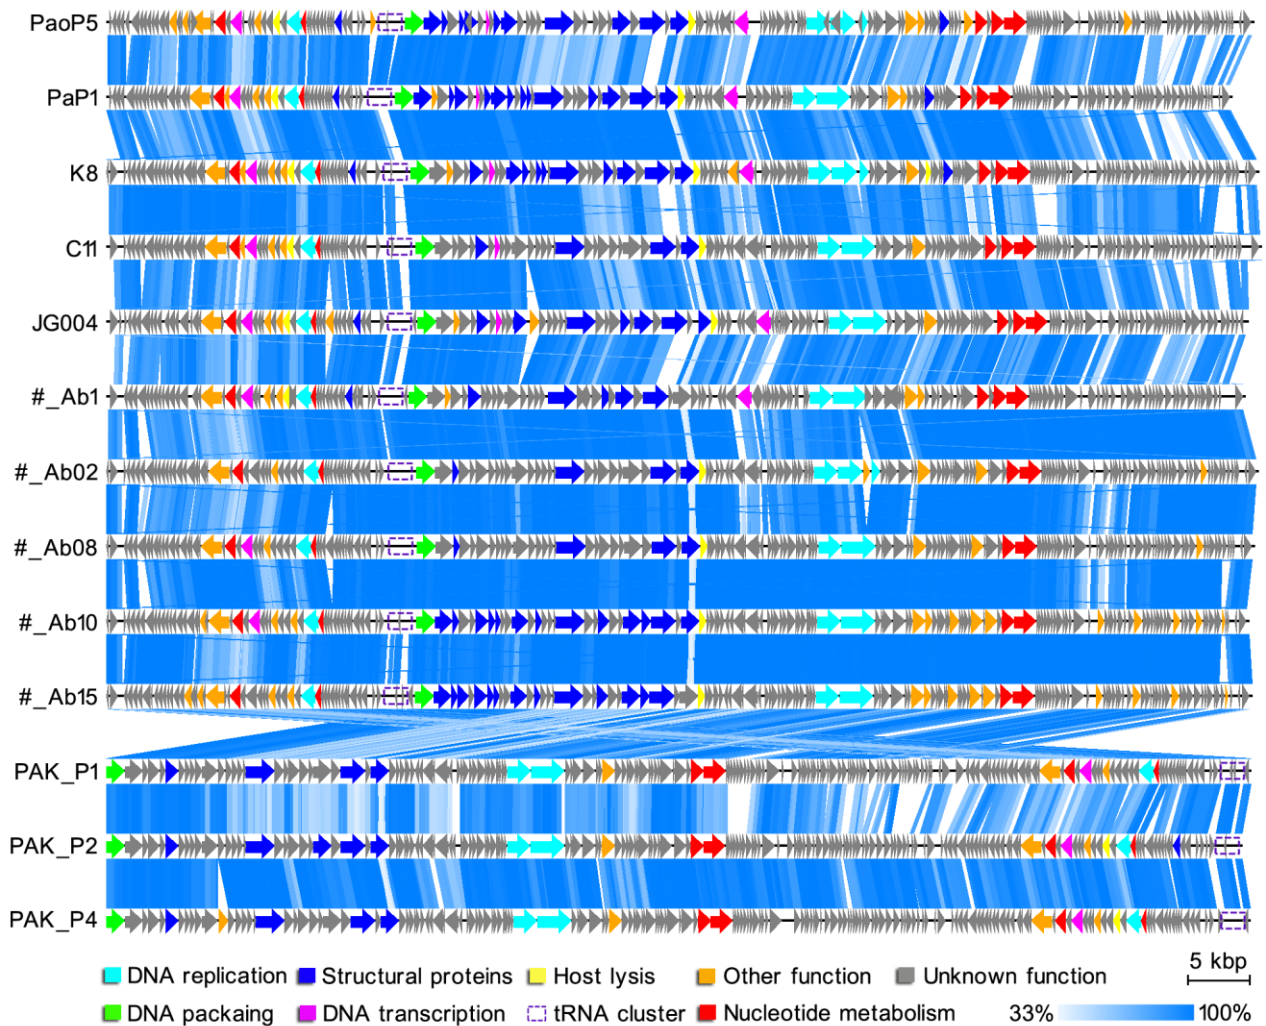

**Figure S5. Visualized tBlastX comparison of the 13 phage genomes.** Arrowheads denote genes, and the identity cut-off is set as 33%. # represents vB\_PaeM\_C2-10. Genome annotations for vB\_PaeM\_C2-10\_Ab10 and vB\_PaeM\_C2-10\_Ab15 were performed in this study. Other function means DNA recombination-mediator protein, phosphatase, nicotinamide phosphoribosyltransferase, phosphohydrolase,

phosphoesterase, pyrophosphatase, HNH endonuclease, phage exonuclease, conserved phage protein, ATPase, DNA methyltransferase, or putative autotransporter.

# Characterization and Comparative Genomic Analyses of *Pseudomonas aeruginosa* Phage PaoP5: New Members Assigned to PAK\_P1-like Viruses

Mengyu Shen, Shuai Le, Xiaolin Jin, Gang Li, Yinling Tan, Ming Li, Xia Zhao, Wei Shen, Yuhui Yang, Jing Wang, Hongbin Zhu, Shu Li, Xiancai Rao, Fuquan Hu & Shuguang Lu

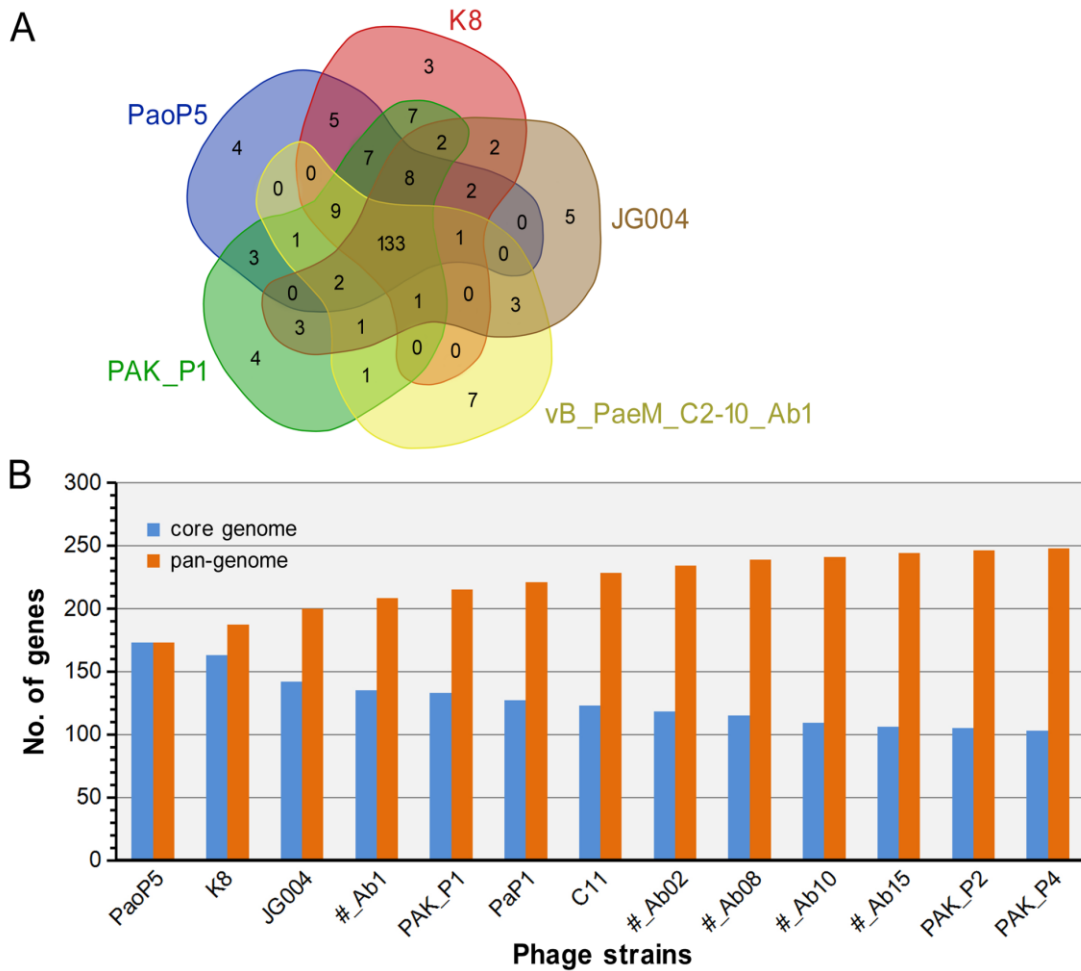

**Figure S6. Sizes of the pan-genome and core genome of PAK\_P1-like viruses.** (A) Venn diagram of genomes of five typical members of PAK\_P1-like viruses. (B) The pan-genome and core genome of PAK\_P1-like viruses. # represents vB\_PaeM\_C2-10.



# Characterization and Comparative Genomic Analyses of *Pseudomonas aeruginosa* Phage PaoP5: New Members Assigned to PAK\_P1-like Viruses

Mengyu Shen, Shuai Le, Xiaolin Jin, Gang Li, Yinling Tan, Ming Li, Xia Zhao, Wei Shen, Yuhui Yang, Jing Wang, Hongbin Zhu, Shu Li, Xiancai Rao, Fuquan Hu & Shuguang Lu

**Table S1. General features of the PaoP5 genome.**

| Features                                   | PaoP5 genome                                                                                                                                                                                                                                             |
|--------------------------------------------|----------------------------------------------------------------------------------------------------------------------------------------------------------------------------------------------------------------------------------------------------------|
| Genome size                                | 93,464 bp                                                                                                                                                                                                                                                |
| G+C content (G+C content host)             | 49.51% (66.35%)                                                                                                                                                                                                                                          |
| No. of predicted genes (proteins)          | 187 (176)                                                                                                                                                                                                                                                |
| Average length of protein-coding sequences | 470 (bp)                                                                                                                                                                                                                                                 |
| % of the genome with non-coding regions    | 11.52%                                                                                                                                                                                                                                                   |
| No. of proteins without homologs           | 13                                                                                                                                                                                                                                                       |
| No. of proteins with predicted functions   | 34                                                                                                                                                                                                                                                       |
| No. of frameshifted Genes                  | 78                                                                                                                                                                                                                                                       |
| Predicted tRNAs                            | tRNA <sup>Glu</sup> ; tRNA <sup>Phe</sup> ; tRNA <sup>Gly</sup> ;<br>tRNA <sup>Pro</sup> ; tRNA <sup>Asn</sup> ; tRNA <sup>Cys</sup> ;<br>tRNA <sup>Asp</sup> ; tRNA <sup>Ile</sup> ; tRNA <sup>Leu</sup> ;<br>tRNA <sup>Arg</sup> ; tRNA <sup>Gln</sup> |

## Characterization and Comparative Genomic Analyses of *Pseudomonas aeruginosa* Phage PaoP5: New Members Assigned to PAK\_P1-like Viruses

Mengyu Shen, Shuai Le, Xiaolin Jin, Gang Li, Yinling Tan, Ming Li, Xia Zhao, Wei Shen, Yuhui Yang, Jing Wang, Hongbin Zhu, Shu Li, Xiancai Rao, Fuquan Hu & Shuguang Lu

**Table S2. Comparison of phages with BlastN query coverage above 90% of the PaoP5 genome.**

| Phage   | Isolated place | Accession | Genome size (bp) | % GC  | Proteins (n) | tRNAs (n) | Query coverage (%) | Identity (%) | Ref. |
|---------|----------------|-----------|------------------|-------|--------------|-----------|--------------------|--------------|------|
| PaP1    | China          | HQ832595  | 91,715           | 49.36 | 167          | 12        | 94                 | 92           | 1-4  |
| K8      | China          | KT736033  | 93,879           | 49.36 | 178          | 13        | 95                 | 93           | -    |
| C11     | China          | KT804923  | 94,109           | 49.39 | 172          | 12        | 98                 | 94           | -    |
| JG004   | Germany        | GU988610  | 93,017           | 49.26 | 161          | 12        | 96                 | 90           | 5    |
| #_Ab1   | Cote d'Ivoire  | HE983845  | 92,777           | 49.28 | 158          | 11        | 94                 | 92           | 6,7  |
| #_Ab02  | Cote d'Ivoire  | LN6105729 | 93,848           | 49.40 | 175          | 14        | 95                 | 93           | 7    |
| #_Ab08  | Cote d'Ivoire  | LN610575  | 93,503,          | 49.21 | 175          | 14        | 95                 | 93           | 7    |
| #_Ab10* | Cote d'Ivoire  | LN610586  | 93,053           | 49.25 | 176          | 11        | 95                 | 92           | 7    |
| #_Ab15* | Cote d'Ivoire  | LN610587  | 93,308           | 49.35 | 177          | 12        | 95                 | 92           | 7    |
| PAK_P1  | France         | KC862297  | 93,198           | 49.50 | 181          | 13        | 94                 | 95           | 8-10 |
| PAK_P2  | France         | KC862298  | 92,495           | 49.29 | 176          | 11        | 93                 | 93           | 9,10 |

|        |        |          |        |       |     |    |    |    |      |
|--------|--------|----------|--------|-------|-----|----|----|----|------|
| PAK_P4 | France | KC862300 | 93,147 | 49.27 | 174 | 13 | 93 | 93 | 9,10 |
|--------|--------|----------|--------|-------|-----|----|----|----|------|

# represents vB\_PaeM\_C2-10.

\*The genome annotations of the two phages were done using RAST<sup>11,12</sup> (Rapid Annotation using Subsystem Technology) in this study.

## References

- 1 Lu, S. *et al.* Genomic and proteomic analyses of the terminally redundant genome of the *Pseudomonas aeruginosa* phage PaP1: establishment of genus PaP1-like phages. *Plos One* **8**, e62933, doi:10.1371/journal.pone.0062933 (2013).
- 2 Le, S. *et al.* Mapping the Tail Fiber as the Receptor Binding Protein Responsible for Differential Host Specificity of *Pseudomonas aeruginosa* Bacteriophages PaP1 and JG004. *Plos One* **8**, e68562, doi:10.1371/journal.pone.0068562 (2013).
- 3 Le, S. *et al.* Chromosomal DNA deletion confers phage resistance to *Pseudomonas aeruginosa*. *Scientific reports* **4**, 4738, doi:10.1038/srep04738 (2014).
- 4 Lu, S. *et al.* Unlocking the mystery of the hard-to-sequence phage genome: PaP1 methylome and bacterial immunity. *Bmc Genomics* **15**, 803, doi:10.1186/1471-2164-15-803 (2014).
- 5 Garbe, J., Bunk, B., Rohde, M. & Schobert, M. Sequencing and Characterization of *Pseudomonas aeruginosa* phage JG004. *BMC microbiology* **11**, 102, doi:10.1186/1471-2180-11-102 (2011).
- 6 Essoh, C. *et al.* The Susceptibility of *Pseudomonas aeruginosa* Strains from Cystic Fibrosis Patients to Bacteriophages. *Plos One* **8**, e60575, doi:10.1371/journal.pone.0060575 (2013).
- 7 Essoh, C. *et al.* Investigation of a Large Collection of *Pseudomonas aeruginosa* Bacteriophages Collected from a Single Environmental Source in Abidjan, Cote d'Ivoire. *Plos One* **10**, e0130548, doi:10.1371/journal.pone.0130548 (2015).
- 8 Debarbieux, L. *et al.* Bacteriophages can treat and prevent *Pseudomonas aeruginosa* lung infections. *The Journal of infectious diseases* **201**, 1096-1104, doi:10.1086/651135 (2010).
- 9 Henry, M., Lavigne, R. & Debarbieux, L. Predicting In Vivo Efficacy of Therapeutic Bacteriophages Used To Treat Pulmonary Infections. *Antimicrobial agents and chemotherapy* **57**, 5961-5968, doi:10.1128/Aac.01596-13 (2013).
- 10 Henry, M. *et al.* The search for therapeutic bacteriophages uncovers one new subfamily and two new genera of *Pseudomonas*-infecting Myoviridae. *Plos One* **10**, e0117163, doi:10.1371/journal.pone.0117163 (2015).
- 11 Overbeek, R. *et al.* The SEED and the Rapid Annotation of microbial genomes using Subsystems Technology (RAST). *Nucleic Acids Res* **42**, D206-214, doi:10.1093/nar/gkt1226 (2014).

- 12 Brettin, T. *et al.* RASTtk: a modular and extensible implementation of the RAST algorithm for building custom annotation pipelines and annotating batches of genomes. *Scientific reports* **5**, 8365, doi:10.1038/srep08365 (2015).

1 **Characterization and Comparative Genomic Analyses of**  
2 ***Pseudomonas aeruginosa* Phage PaoP5: New Members**  
3 **Assigned to PAK\_P1-like Viruses**

4  
5 Mengyu Shen, Shuai Le, Xiaolin Jin, Gang Li, Yinling Tan, Ming Li, Xia Zhao,  
6 Wei Shen, Yuhui Yang, Jing Wang, Hongbin Zhu, Shu Li, Xiancai Rao, Fuquan  
7 Hu & Shuguang Lu

8

9 **Text S1. Supplementary Materials and Methods.**

10 Phage isolation, propagation, and purification. Phage PaoP5 was isolated  
11 from the sewage of Southwest Hospital (Chongqing, China) given a standard lambda  
12 phage isolation protocol<sup>1</sup>. Briefly, sewage samples were centrifuged at 10,000 g for 10  
13 min. Subsequently, the supernatant was filtered through a 0.22 µm filter. Then, 3 mL  
14 PAO1 culture at log phase was added to the supernatant and cultured at 37 °C for 12 h.  
15 The culture was filtered again through a 0.22 µm filter to remove bacteria. The  
16 supernatant was serially diluted and spotted on the bacterial lawn according to the  
17 double-agar layer method. After incubation at 37 °C overnight, a single plaque was  
18 separated, and phages were obtained and added to a culture of PAO1, which was at  
19 the log phase. After incubation at 37 °C for 6 h, a few drops of chloroform were added  
20 to the culture. The culture was then centrifuged for 5 min at 10,000 g and filtered  
21 through a 0.22 µm filter. The resulting phage lysate was stored at 4 °C for further  
22 analysis. Crude phage suspensions of PaoP5 were concentrated and purified by

23 PEG8000 precipitation in accordance with the method of Govind *et al.*<sup>2</sup>. The purified  
24 PaoP5 particles were further purified by CsCl gradient ultracentrifugation<sup>3</sup>.

25

26 **DNA sequencing.** DNA extraction and purification were performed as described  
27 previously<sup>4</sup>. Briefly, PaoP5 particles purified by CsCl gradient ultracentrifugation  
28 were digested by proteinase K (50  $\mu\text{g mL}^{-1}$ ) at 56 °C for 1 h to release phage DNA.  
29 Then, the mixture was purified with phenol–chloroform–isoamyl alcohol (25:24:1) at  
30 5,000 *g* for 10 min. The aqueous layer was extracted again with chloroform at 5,000  
31 *g* for 10 min. Isopropanol was used to precipitate DNA, and the precipitated DNA was  
32 collected and washed with ethanol. The obtained PaoP5 DNA was suspended in TE  
33 buffer (pH 8.0) for use. DNA sequencing was carried out at the Institute of  
34 Microbiology and Epidemiology (Academy of Military Medical Sciences, Beijing,  
35 China) using the Ion Torrent Personal Genome Machine (PGM)<sup>5</sup>. Sequence reads  
36 were assembled using the Newbler v2.9 software package (454 Life Sciences,  
37 Branford, CT).

38

39 **Analysis of PaoP5 genome termini.** The software package DNASTar<sup>6</sup> was  
40 used to simulate the restriction enzyme mapping of the PaoP5 genome sequence. The  
41 PaoP5 DNA was digested by restriction endonuclease SpeI (NEB, MA, USA). In a  
42 reaction system of 20  $\mu\text{L}$ , 10 units of the restriction endonuclease and 200 ng of  
43 PaoP5 DNA were used. The mixture was incubated at 37 °C for 120 min and then  
44 used to perform agarose gel electrophoresis. The sequencing coverage plot of the



45 PaoP5 genome was generated by the Newbler v2.9 software package (454 Life  
46 Sciences, Branford, CT). Phage DTR sequences were subjected to BlastN analysis by  
47 using EasyFig (<http://mjsull.github.io/Easyfig/>)<sup>7</sup>.

48

49 **Sequence analysis and genome annotation.** The software package  
50 DNASTar<sup>6</sup> and DNAMAN (<http://www.lynnon.com/>) were used to analyze the general  
51 features of the PaoP5 genome sequence. PaoP5 genes were predicted using RAST  
52 (<http://rast.nmpdr.org/>)<sup>8</sup> and fgenesV  
53 (<http://linux1.softberry.com/berry.phtml?topic=virus&group=programs&subgroup=gfi>  
54 ndv), and the results were merged and checked manually. DNA sequences and protein  
55 sequences were scanned for homologs via BLAST<sup>9</sup>. The circular presentation of the  
56 PaoP5 genome was performed using BLAST Ring Image Generator (BRIG)  
57 (<http://brig.sourceforge.net/>)<sup>10</sup> and CGView  
58 ([http://stothard.afns.ualberta.ca/cgview\\_server/](http://stothard.afns.ualberta.ca/cgview_server/))<sup>11</sup>, and the results of BRIG and  
59 CGView were combined to present the genome map.

60

## 61 **References**

- 62 1 Sambrook, J. & Russell, D. W. *The condensed protocols from Molecular cloning : a*  
63 *laboratory manual.* (Cold Spring Harbor Laboratory Press, 2006).
- 64 2 Govind, R., Fralick, J. A. & Rolfe, R. D. Genomic organization and molecular characterization  
65 of *Clostridium difficile* bacteriophage PhiCD119. *Journal of bacteriology* **188**, 2568-2577,  
66 doi:10.1128/JB.188.7.2568-2577.2006 (2006).
- 67 3 Casas, V. & Rohwer, F. Phage metagenomics. *Methods in enzymology* **421**, 259-268,  
68 doi:10.1016/S0076-6879(06)21020-6 (2007).
- 69 4 Lu, S. G. *et al.* Genomic and Proteomic Analyses of the Terminally Redundant Genome of the  
70 *Pseudomonas aeruginosa* Phage PaP1: Establishment of Genus PaP1-Like Phages. *PLoS One*  
71 **8**, doi:ARTN e62933

72 10.1371/journal.pone.0062933 (2013).

73 5 Rothberg, J. M. *et al.* An integrated semiconductor device enabling non-optical genome  
74 sequencing. *Nature* **475**, 348-352, doi:10.1038/nature10242 (2011).

75 6 Rosseel, T. *et al.* DNase SISPA-next generation sequencing confirms Schmallenberg virus in  
76 Belgian field samples and identifies genetic variation in Europe. *PLoS One* **7**, e41967,  
77 doi:10.1371/journal.pone.0041967 (2012).

78 7 Sullivan, M. J., Petty, N. K. & Beatson, S. A. Easyfig: a genome comparison visualizer.  
79 *Bioinformatics* **27**, 1009-1010, doi:10.1093/bioinformatics/btr039 (2011).

80 8 Brettin, T. *et al.* RASTtk: a modular and extensible implementation of the RAST algorithm for  
81 building custom annotation pipelines and annotating batches of genomes. *Scientific reports* **5**,  
82 8365, doi:10.1038/srep08365 (2015).

83 9 Singh, H. & Raghava, G. P. S. BLAST-based structural annotation of protein residues using  
84 Protein Data Bank. *Biol Direct* **11**, doi:Artn 4  
85 10.1186/S13062-016-0106-9 (2016).

86 10 Alikhan, N. F., Petty, N. K., Ben Zakour, N. L. & Beatson, S. A. BLAST Ring Image  
87 Generator (BRIG): simple prokaryote genome comparisons. *BMC genomics* **12**, 402,  
88 doi:10.1186/1471-2164-12-402 (2011).

89 11 Grant, J. R. & Stothard, P. The CGView Server: a comparative genomics tool for circular  
90 genomes. *Nucleic acids research* **36**, W181-W184, doi:10.1093/nar/gkn179 (2008).

91

92

93
